# Supplementary material
Source: PubMed Central journal article supplement (PMC8761225)
Supplement: NIHMS1743920-supplement-1743920_Supp_material.pdf [file NIHMS1743920-supplement-1743920_Supp_material.pdf]

## SUPPLEMENTAL MATERIAL

### **Renal revascularization attenuates myocardial mitochondrial damage and improves diastolic function in pigs with metabolic syndrome and renovascular hypertension**

Running head: Mitochondria in renovascular disease

Rahele A. Farahani<sup>1</sup>, MD; Shasha Yu<sup>1</sup>, PhD; Christopher M. Ferguson<sup>1</sup>, Xiang-Yang Zhu<sup>1</sup>, MD, PhD; Hui Tang<sup>1</sup>; Kyra L. Jordan<sup>1</sup>; Ishran M. Saadiq<sup>1</sup>, Sandra M. Herrmann<sup>1</sup>, MD; Alejandro R. Chade<sup>3</sup>, MD; Amir Lerman<sup>2</sup>, MD, Lilach O. Lerman<sup>1,2</sup>, MD, PhD; and Alfonso Eirin<sup>1</sup>, MD.

<sup>1</sup>Department of Internal Medicine, Division of Nephrology and Hypertension, Mayo Clinic, Rochester, MN

<sup>2</sup>Department of Cardiovascular Diseases, Mayo Clinic, Rochester, MN

<sup>3</sup>Department of Physiology and Biophysics, University of Mississippi Medical Center, Jackson, MS

## Figure legends

*Figure S1. Schematic of the experimental protocol.* MetS: Metabolic syndrome, RVH: Renovascular hypertension, PTRA: Percutaneous transluminal renal angioplasty. Four groups of pigs (n=6 each) were studied after 16 weeks of diet-induced MetS and RVH, MetS+RVH treated 4 weeks earlier with PTRA, and Lean+Sham and MetS+Sham controls.

*Figure S2. Renal revascularization increased the number of subsarcolemal mitochondria.* Representative transmission electron microscopy images of subsarcolemal mitochondria (arrows) and quantification of mitochondrial density, area, and matrix density in study groups (n=6/group each). \*p<0.05 vs. Lean+Sham; †p<0.05 vs. MetS+Sham; ‡p<0.05 vs. MetS+RVH.

*Figure S3. PTRA preserved cardiac endothelial cell mitochondria.* Representative transmission electron microscopy images of cardiac endothelial cell mitochondria (arrows) and quantification of mitochondrial density, area, and matrix density in study groups (n=6/group each). \*p<0.05 vs. Lean+Sham; †p<0.05 vs. MetS+Sham; ‡p<0.05 vs. MetS+RVH.

**Fig. S1**

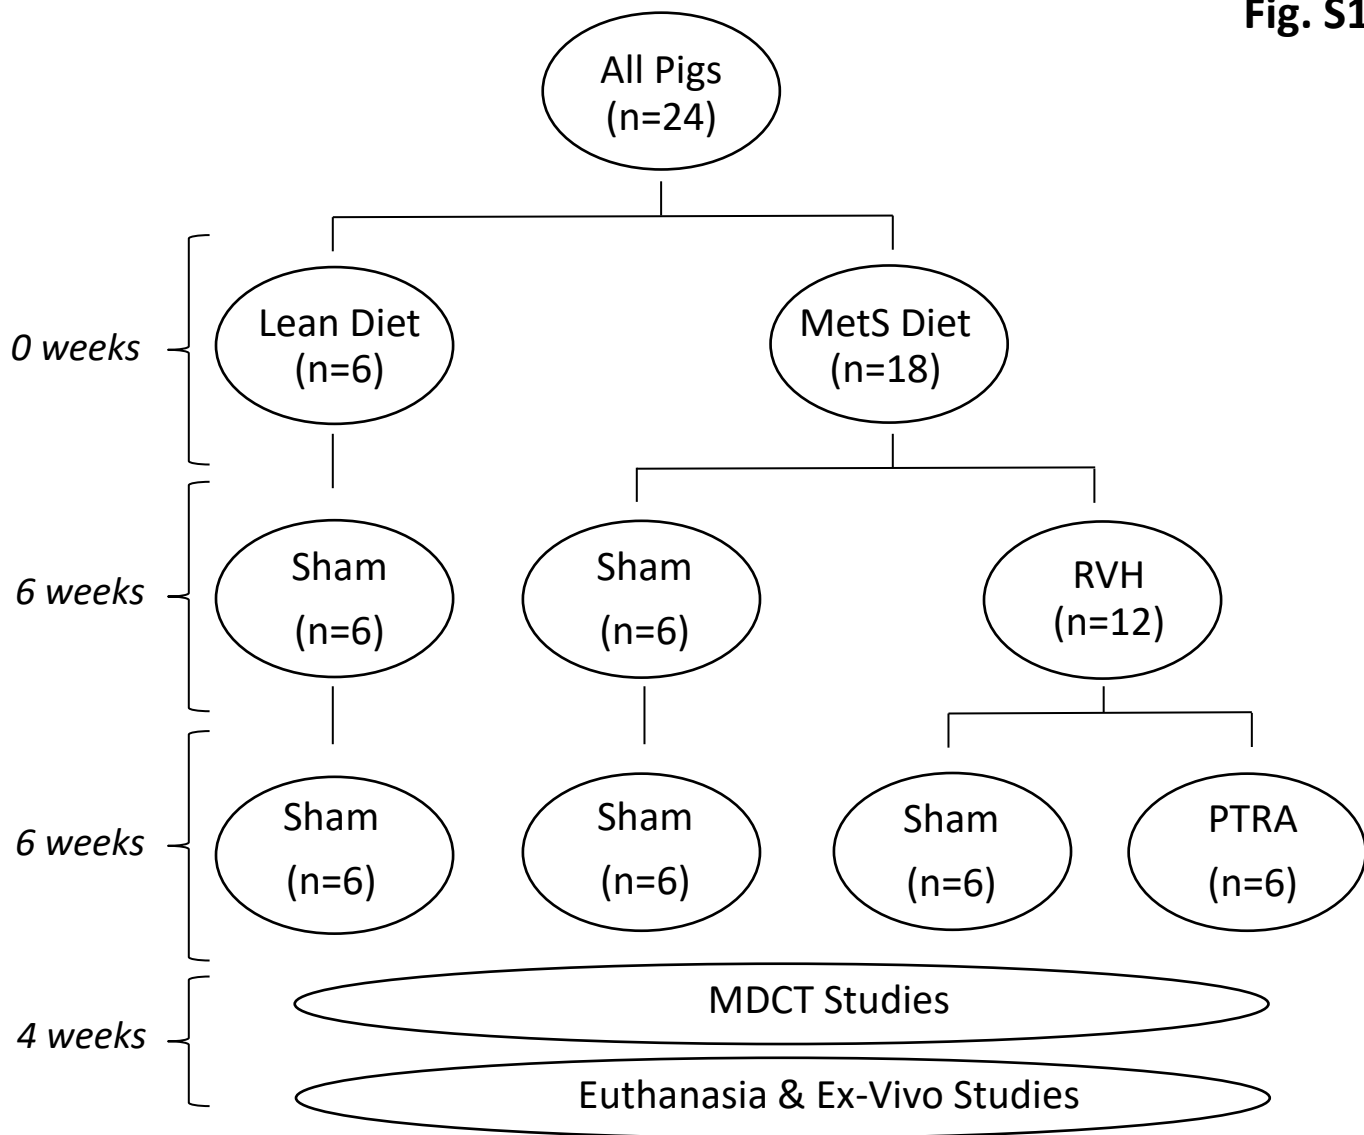

**Fig. S2**

Lean+Sham

MetS+Sham

MetS+RVH

MetS+RVH+PTRA

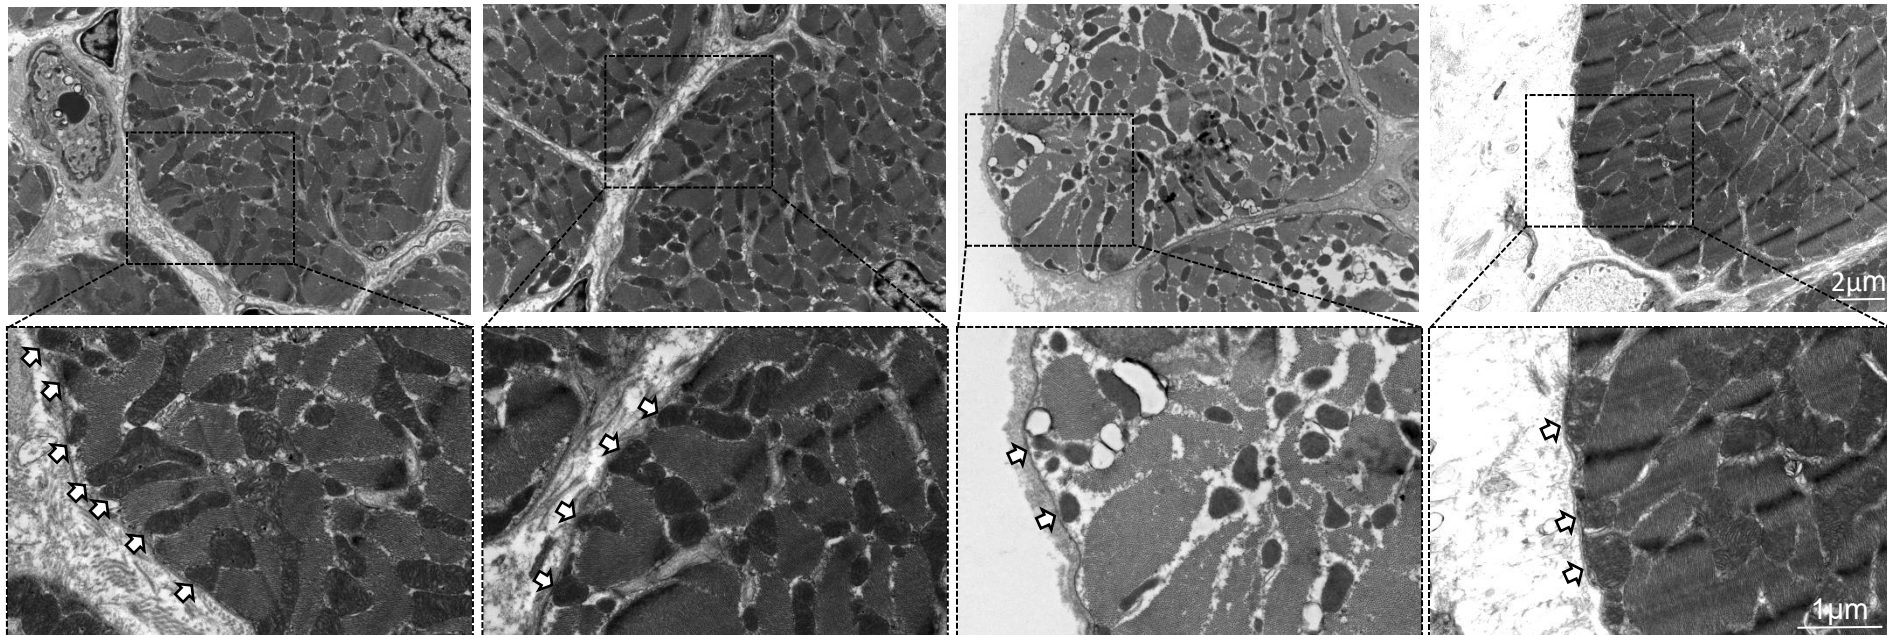

Subsarcolemmal mitochondrial density (mitochondria/field)

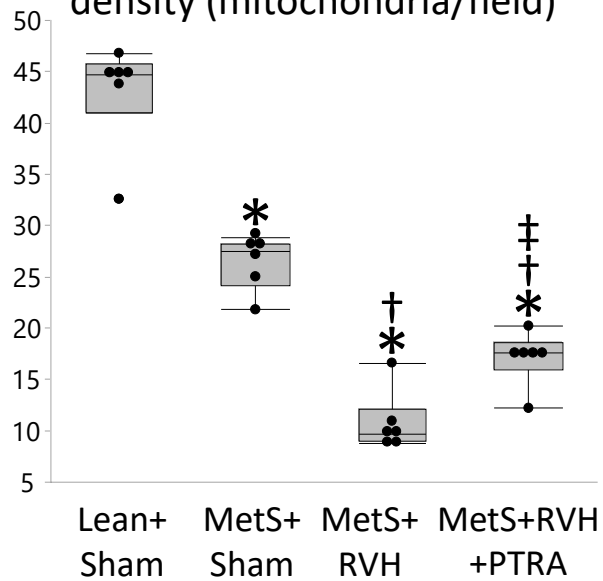

Subsarcolemmal mitochondrial area (nm<sup>2</sup>x10<sup>6</sup>)

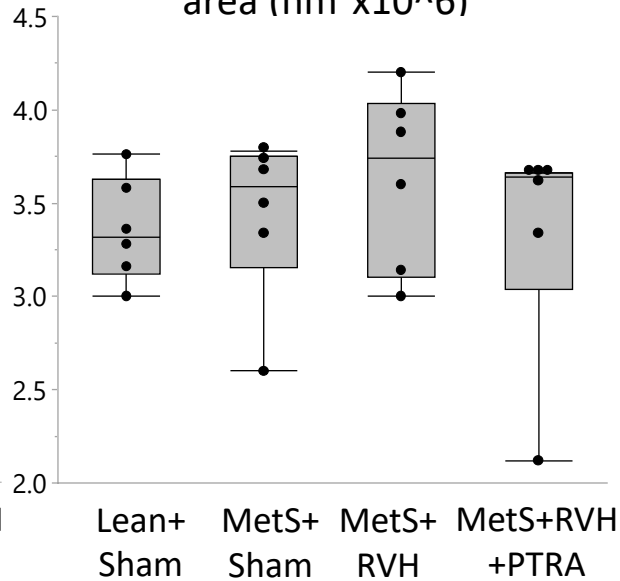

Subsarcolemmal mitochondrial matrix density (arbitrary units)

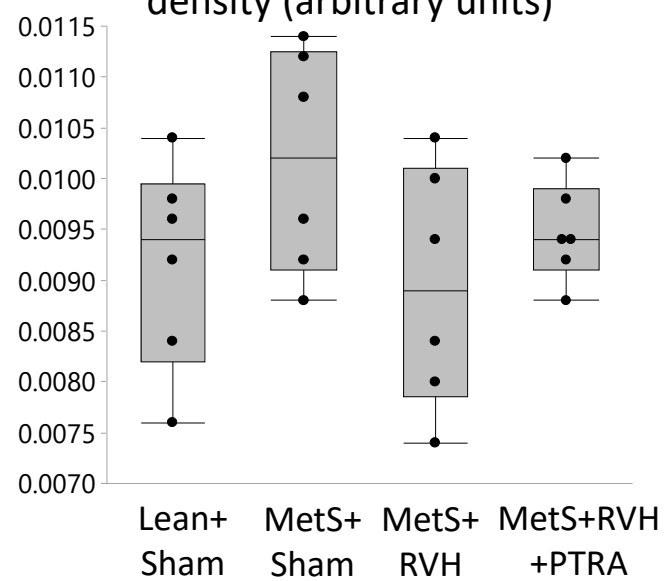

**Fig. S3**

Lean+Sham

MetS+Sham

MetS+RVH

MetS+RVH+PTRA

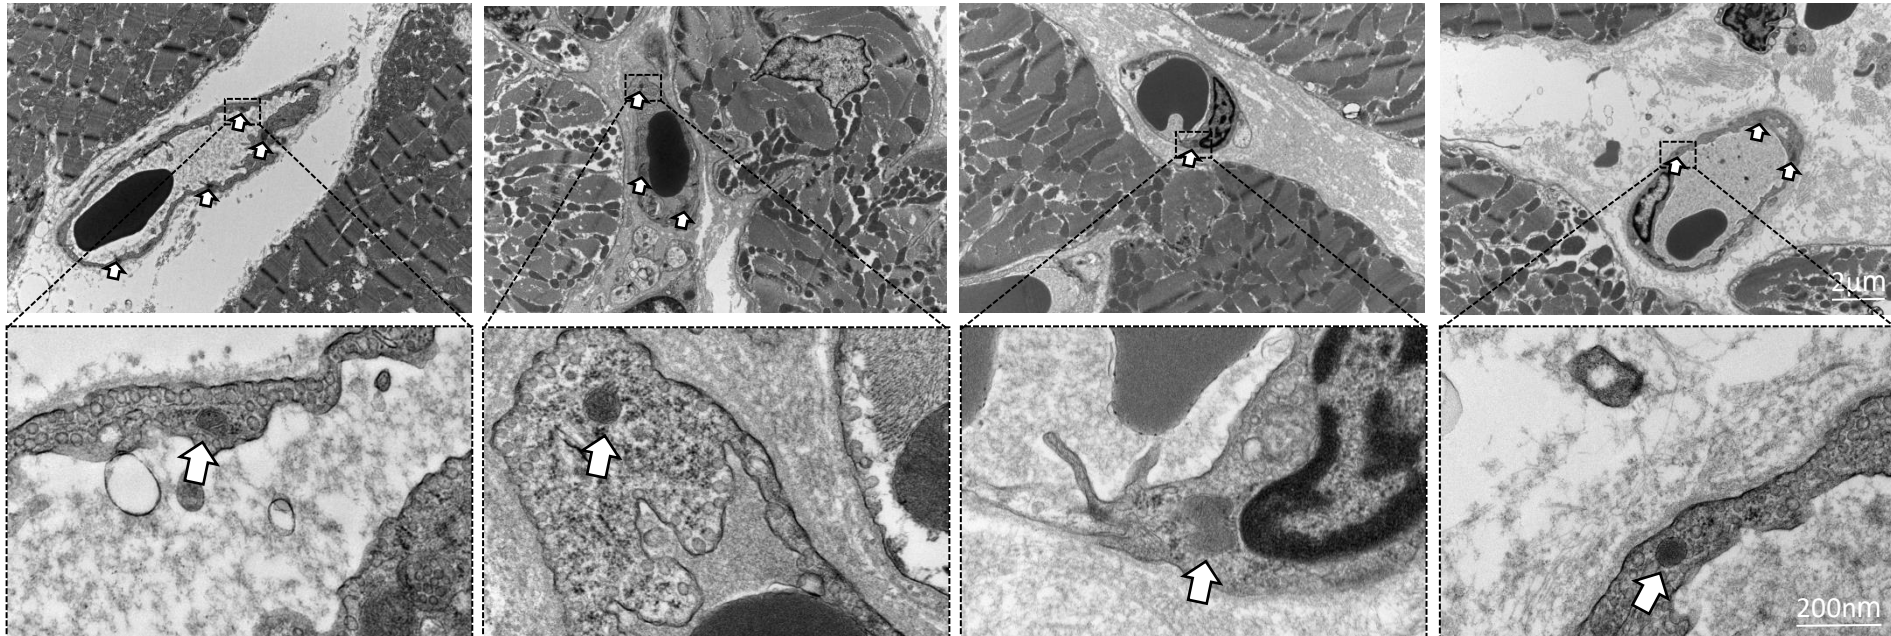

Endothelial cell mitochondrial density (mitochondria/field)

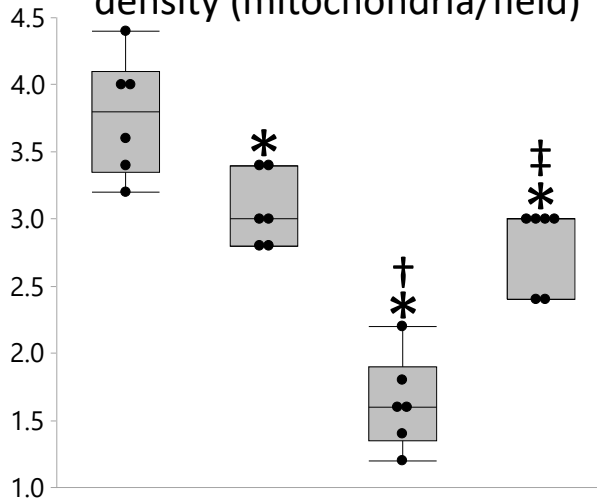

Endothelial cell mitochondrial area (nm<sup>2</sup>x10<sup>6</sup>)

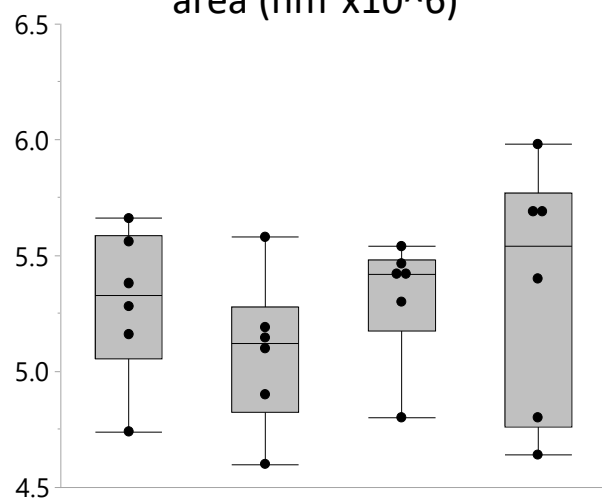

Endothelial cell mitochondrial matrix density (arbitrary units)

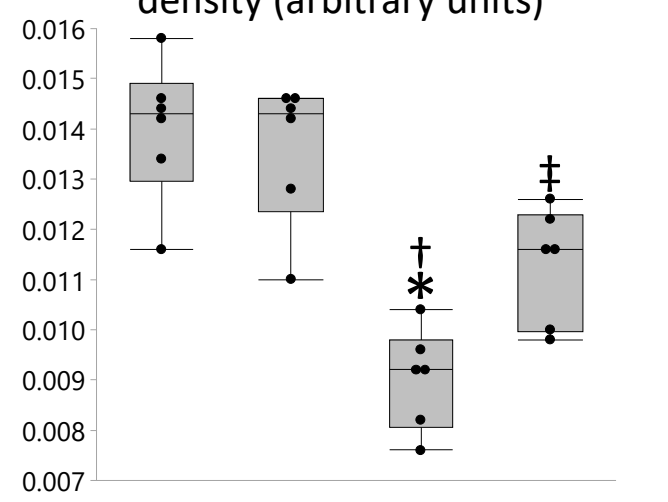

Lean+ Sham MetS+ Sham MetS+ RVH MetS+RVH +PTRA

Lean+ Sham MetS+ Sham MetS+ RVH MetS+RVH +PTRA

Lean+ Sham MetS+ Sham MetS+ RVH MetS+RVH +PTRA
